# Supplementary material for: Efficacy of genogroup 1 based porcine epidemic diarrhea live vaccine against genogroup 2 field strain in Japan
Source: Springer Nature journal article supplement (doi:10.1186/s12985-018-0940-8), 2018-02-02
Supplement: MOESM1 [file 15436110]

Table S1: The number of dead piglets by age in weeks at field farms with PED.

| Farm   | Weeks <sup>a</sup> |         |         |         |         |         |
|--------|--------------------|---------|---------|---------|---------|---------|
|        | -3                 | -2      | -1      | 0       | 1       | 2       |
| Farm A | 67/403             | 104/401 | 210/396 | 380/396 | 112/401 | 2/410   |
| Farm B | 2/498              | 44/695  | 193/522 | 354/370 | 284/444 | 134/459 |
| Farm C | 2/190              | 58/200  | 444/500 | 583/596 | 552/610 | 109/190 |

<sup>a</sup>Weeks are indicated as follows: 0=the mortality rate of piglets born in the week of PED outbreak, -1, -2 or -3=the mortality rate of piglets in 1, 2, or 3 weeks of age at the week of PED outbreak, respectively, 1 or 2=the mortality rate of piglets born in the next weeks of PED outbreak.
